# Supplementary material for: Hesperidin and Chlorogenic Acid Synergistically Inhibit the Growth of Breast Cancer Cells via Estrogen Receptor/Mitochondrial Pathway
Source: MDPI journal article supplement (doi:10.3390/life11090950), 2021-09-10
Supplement: s1 [file s1]

Supplementary Materials

# Hesperidin and Chlorogenic Acid Synergistically Inhibit the Growth of Breast Cancer Cells via Estrogen Receptor/Mitochondrial Pathway

Pang-Hung Hsu <sup>1,2,3,†</sup>, Wei-Hsuan Chen <sup>1,†</sup>, Chen JuanLu <sup>4,†</sup>, Shu-Chen Hsieh <sup>4</sup>, Shih-Chao Lin <sup>5</sup>, Ru-Tsun Mai <sup>6</sup> and Shiow-Yi Chen <sup>1,\*</sup>

**Hes**

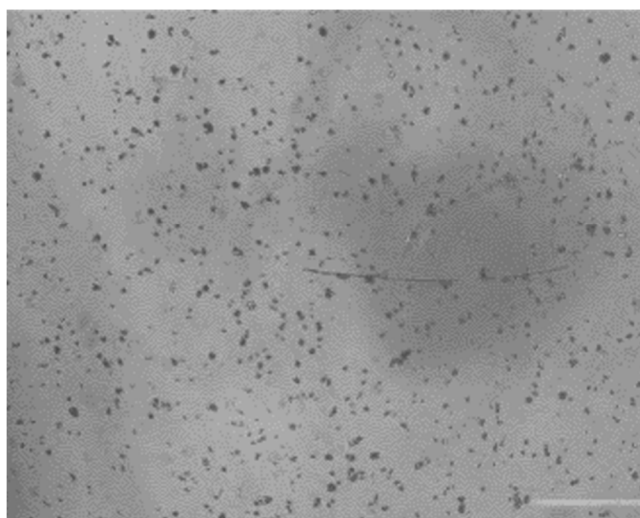

**Hes+CA**

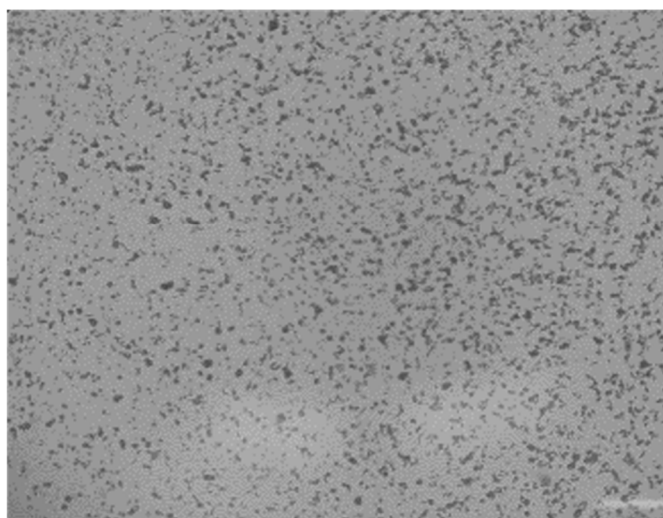

**Figure S1.** Representative photos showing crystallization of hesperidin at concentration higher than 100  $\mu$ M with or without chlorogenic acid.

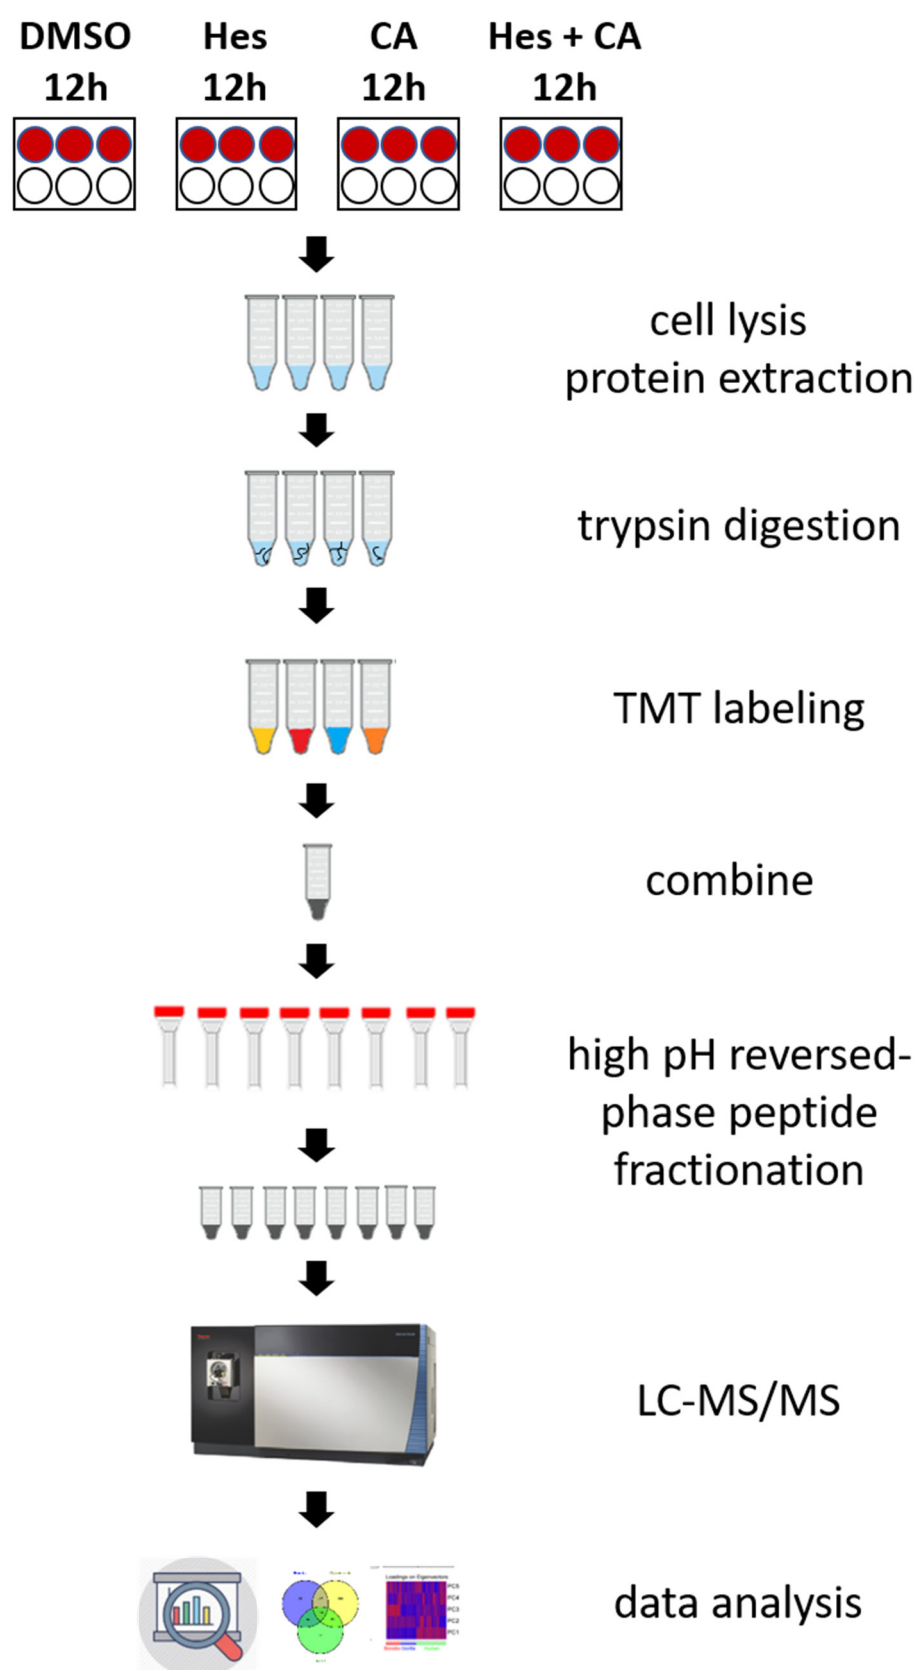

**Figure S2.** Flow chart of sample preparation and analysis of mass-spectrometry.
